# Supplementary material for: Exercise Training Improves Tumor Control by Increasing CD8+ T-cell Infiltration via CXCR3 Signaling and Sensitizes Breast Cancer to Immune Checkpoint Blockade
Source: Oxford University Press journal article supplement (doi:10.1158/2326-6066.cir-20-0499), 2021-04-10
Supplement: 23266066cir200499-sup-245230_3_supp_6977869_qqjf3t.docx [file 23266066cir200499-sup-245230_3_supp_6977869_qqjf3t.docx]

Supplementary Information

**Exercise training improves tumor control by increasing infiltration of CD8+ T cells via CXCR3 signaling and sensitizes breast cancer to immune checkpoint blockade**

***Authors and affiliations:***

Igor L. Gomes-Santos1, Zohreh Amoozgar1, Ashwin S. Kumar1,2, William W. Ho1, Kangsan Roh1, Nilesh P. Talele1, Hannah Curtis1, Kosuke Kawaguchi1,3, Rakesh K. Jain1, Dai Fukumura1

1Edwin L. Steele Laboratories, Department of Radiation Oncology, Massachusetts General Hospital & Harvard Medical School, Boston, MA, USA.

2Harvard-MIT Division of Health Sciences and Technology, Massachusetts Institute of Technology, Cambridge, MA, USA.

3Current address: Department of Breast Surgery, Kyoto University Graduate School of Medicine, Kyoto, Japan.

***Running Title:*** Exercise training improves antitumor immunity

***Keywords:*** Exercise, Vascular normalization, Tumor microenvironment, Tumor immunology, Immune checkpoint blockade

**SUPPLEMENTARY FIGURES**

**Supplementary Figure S1. Exercise testing and prescription.** **A**, Conceptual design of the maximal exercise test. After a few days of acclimatization, mice were put on the running treadmill, and incremental exercise (3 m/min every 3 min, starting with 6 m/min) was performed until volitional exhaustion (when mice are not able to run anymore). This determined the maximal running velocity, which was used for ExTr prescription. **B**, Conceptual design of an exercise training session. After mice were put on the running treadmill, an approximate 3 min warm-up period at 40% maximal running velocity was performed. Following the warm-up session, the main component of the ExTr started, which consisted of running at 60% of maximal running velocity from 30-45 min, followed by a ~2 min active recovery period prior to removal from the running treadmill. **C**, ExTr progression, with training sessions starting at 30min, with consecutive daily increments of 5min until reach 45min per session. For tumor microenvironment analysis, the protocol ended after 7 days of ExTr (Short-term ExTr). To monitor tumor growth up to the control group's tumor size endpoint, ExTr was performed daily for 14 days (Long-term ExTr). **D**, Relative ExTr exercise intensity for C57BL/6 (bearing E0771 tumors) and FVB (bearing MCa-M3C tumors) mice, showing both strains trained at the same relative exercise intensity. **E**, However, they display different maximal running velocities. If the same velocity was applied for both strains, it would either overestimate or underestimate ExTr load for C57BL/6 and FVB, respectively. **F**, For compliance with the ExTr program, the amount of completed sessions during the Short-term ExTr program was averaged. This was measured by the percentage of completed sessions, which could be interrupted for a given mouse either because it reached the 30s of accumulated shocks or refused to continue running despite stimuli. Mice that did not reach at least 75% of the expected ExTr load were removed from the study. Statistical comparison was determined by the Mann-Whitney test (D-F). Box Plot is indicating the median ± interquartile range.

**Supplementary Figure S2. Exercise training slows tumor growth**. The antitumor effect of ExTr was demonstrated by delayed tumor growth. Individual tumor growth and time to triple tumor volume from Figure 1 of the manuscript (A-F). In pilot studies, we adopted a 5-day per week protocol for 2 weeks. Moreover, we performed a maximal exercise test before tumor implantation and started ExTr when tumors reached 60-75mm3 so that mice concluded 2-weeks of ExTr protocols before the Control group reached 1cm3. ExTr intensity and progression followed the same protocol described in the manuscript and showed the same delay in tumor growth (G), final tumor weight (H) and time to triple tumor volume (I). Same ExTr interventions were conducted in additional models, adjusted for each strain’s exercise capacity. For MMTV-PyM, ExTr started one week after tumor implantation (when tumors were on average 20 mm3) for 7 consecutive days (J). For the obesity model, 5 days per week for 2 weeks of ExTr (as in G-I), started when tumors have reached 100 mm3. Obesity accelerated primary tumor growth, which was prevented by ExTr (K). Statistical comparison by unpaired Student’s t-test (C, F, H, I) or two-way (G, J, K) ANOVA. n=6-12 mice per group (A-I), n=8 per group in MMTV-PyMT (J) and n=3-4 per group (K). Data presented as mean ± SEM or median ± interquartile range (C, F, I).

**Supplementary Figure S3. Effects of ExTr on effort tolerance.** A–C**,** E0771 tumor-bearing mice. ExTr counteracted cancer-induced fatigue, as demonstrated by enhanced time to exhaustion (A), Total running distance (B) and running performance enhancement from baseline (C). Further analysis demonstrated an inverse relation between tumor volume and changes in running performance (D). Normal means non-tumor bearing mice; Control and ExTr refers to mice bearing E0771 tumors. n=9-10 mice per group. Statistical comparison by unpaired Student’s t-test (A-C) and regression analysis (D). Data presented as mean ± SEM.

**Supplementary Figure S4. Late distant metastasis with ExTr.** Spontaneous tumor metastasis was observed in the MCa-M3C model. When tumors reached 1 cm3, they were surgically removed (as in Ref #20 of the manuscript) (A). Four weeks after primary tumor resection, we observed the number of macroscopic (B) and the incidence (C) of metastatic tumors. Statistical comparison by unpaired Student’s t-test. n=5 mice per group. Data presented as mean ± SEM.

**Supplementary Figure S5. Bulk RNA-sequence. A–C,** We submitted time- and size-matched tumors from Control and ExTr groups to RNA-seq (*A*). 7 days of ExTr did not induce a markedly differential expression of single genes, as can be observed by the Volcano plot (*B*) or the heat map of differentially expressed genes (*C*). **D**, On the other hand, it changed several pathways, as indicated by the Gene Set Enrichment Analysis (GSEA). Among the gene sets modulated by ExTr, 7% was significantly upregulated, and 16% downregulated. **E**, Interaction map of pathways modulated by ExTr reveals an increase (blue) of signatures related to mitochondrial function and oxidative metabolism and a reduction (red) of lipid-related pathways. n=5 mice per group. Detailed differentially expressed gene list can be found in Supplementary Table 1.

**Supplementary Figure S6. CD8+ T cell infiltration.** As in Figure 4 of the manuscript, larger tumors (from supplementary Fig. S2G-I) and in obesity-associated BCs (Fig. SK) increased CD8+ T cell infiltration with ExTr (by flow cytometry, A-B). We found an inverse relationship between final tumor volume and density of CD8+ T cells (C), and a positive correlation between Running distance with CD8+ T cells (D). n=9-10 mice per group (A, C-D), and n=3-4 per group (B). Statistical comparison by one-way ANOVA (A) or unpaired Student’s t-test (B), and regression analysis (C-D). Data presented as mean ± SEM.

**Supplementary Figure S7. ExTr does not change the myeloid cell population. A–F**, Quantification of immune cell infiltration by flow cytometry reveals that ExTr does not change the number of tumoral immune cells in MCa-M3, while it increases CD45+ cell infiltration in E0771 (*A*). No differences were found in Natural Killer cells (CD45+TCRβ−NK1.1+, (*B*)), dendritic cells (DC, CD45+Ly6G-CD11blowCD11c+, (*C*)), tumor-associated macrophages (TAMs, CD45+ CD11b+F4/80+Ly6G-, (*D*)), neither M1 (MHCII+, (*E*)) or M2 (CD206+, (*F*)) macrophages. **G**, Representative gating strategy for flow cytometry. Statistical comparison by unpaired Student’s t-test, n=6-10 per group. Data presented as mean ± SEM.

**Supplementary Figure S8. Checkpoint receptor profile in CD8+ T cells.** **A–B**, Percentage of CD8+ T cells expressing PD-1, CTLA4, Tim3, and Lag for MCa-M3C (*A*) and E0771 (*B*). **C**, Exercise also increased expression of PD-L1 in non-immune components of MCa-M3C and E0771 tumors (CD45-PD-L1+). **D**, As ExTr increased the amount of CD8+ T cells in the tumors, CD8+PD1+ cells also increased proportionally. **E**, ExTr did not change (MCa-M3C) while it reduced (E0771) percentage of cells that exhibited anergic status (PD-1+CTLA-4+ in CD8+ T cells). **F**, However, the actual number of PD-1+CTLA-4+ CD8+ T cells increased in MCa-M3C but remained the same in E0771. The difference in the number of CD8+PD1+ cells in these models (*D*) may contribute to this dichotomy. Statistical differences are comparing groups by unpaired Student’s t-test. n=5-10 mice per experiment, 2-3 repeats. Data presented as mean ± SEM.

**Supplementary Figure S9. The effect of ExTr and anti-CD8 on tumor progression**. **A–D**, ExTr-induced tumor growth control was blunted by depletion of CD8+ T cells. Statistical comparison by Student’s *t-test* *(D)*. **E,** Comparison of tumor growth from IgG vs. anti-CD8 (αCD8). N=7-8 per group. Statistical analysis using Kruskal-Wallis test and data presented as median ± interquartile range (*D*), or two-way ANOVA and mean ± SEM (*E*).

**Supplementary Figure S10. Cellular expression of CXCL9.**

**Supplementary Figure S10. Cellular expression of CXCL9. A.,** Gating strategy for detecting CXCL9-expressing cells (chemokine protein levels) on MCa-M3C model. **B–C**, Percentage and total number of cells expressing CXCL9 (CXCL9+) in non-immune tumoral cells (CD45-, including tumor cells and non-immune stromal cells). **D–I**, CXCL9 expression in immune cells – pan-immune cells (CD45+, *D–E*), myeloid cells (CD45+CD11b+, *F–G*) and macrophages (CD45+CD11b+F4/80+, *H–I*). **J**, Gating strategy for detecting CXCL9-expressing endothelial cells (CD31+) in the MCa-M3C model showing no distinction of CXCL9 cell population in endothelial cells. N=6-8 mice per group. Data presented as mean ± SEM (*B-E*).

**Supplementary Figure S11. Tumor growth kinetics under ICB treatment. A–F,** ExTr exerts a synergistic effect with anti-PD-1 monotherapy (*A–B*), as well as combined ICB (anti-PD-1 and anti-CTLA-4 every 4 days) treatment (*C–G*). Individual tumor growth kinetics *(C–F)*, with Long-term ExTr (14 days of ExTr), started when tumors reached 100mm3. **G**, ExTr alleviates cancer-induced fatigue under ICB treatment. Statistical comparison by two-way *(A)* or one-way (*B, G*) ANOVA. n=8-14 for anti-PD-1 monotherapy; n=15 for Normal (non-tumor bearing mice) and n=12-16 for ICB). Data presented as mean ± SEM.

**Supplementary Table S1.** Gene Set Enrichment Analysis (GSEA) pathways modulated by ExTr after 7 days of ExTr, in the E0771 (C57BL6/J) female mice model.

***Top 100 upregulated GSEA pathways with ExTr***

| | **NAME** | **NES** | **FDR q-val** | | --- | --- | --- | | GO_OLFACTORY_RECEPTOR_ACTIVITY | 2.85 | 0.00 | | REACTOME_OLFACTORY_SIGNALING_PATHWAY | 2.78 | 0.00 | | KEGG_OLFACTORY_TRANSDUCTION | 2.65 | 0.00 | | REACTOME_PEPTIDE_CHAIN_ELONGATION | 2.54 | 0.00 | | KEGG_RIBOSOME | 2.52 | 0.00 | | GO_ODORANT_BINDING | 2.47 | 0.00 | | REACTOME_3_UTR_MEDIATED_TRANSLATIONAL_REGULATION | 2.46 | 0.00 | | GO_SENSORY_PERCEPTION_OF_CHEMICAL_STIMULUS | 2.46 | 0.00 | | GO_RIBOSOMAL_SUBUNIT | 2.41 | 0.00 | | REACTOME_INFLUENZA_VIRAL_RNA_TRANSCRIPTION_AND_REPLICATION | 2.35 | 0.00 | | GO_TRANSLATIONAL_INITIATION | 2.34 | 0.00 | | GO_ESTABLISHMENT_OF_PROTEIN_LOCALIZATION_TO_ENDOPLASMIC_RETICULUM | 2.32 | 0.00 | | REACTOME_SRP_DEPENDENT_COTRANSLATIONAL_PROTEIN_TARGETING_TO_MEMBRANE | 2.29 | 0.00 | | REACTOME_NONSENSE_MEDIATED_DECAY_ENHANCED_BY_THE_EXON_JUNCTION_COMPLEX | 2.29 | 0.00 | | REACTOME_TRANSLATION | 2.27 | 0.00 | | GO_RIBOSOME | 2.26 | 0.00 | | REACTOME_ACTIVATION_OF_THE_MRNA_UPON_BINDING_OF_THE_CAP_BINDING_COMPLEX_AND_EIFS_AND_SUBSEQUENT_BINDING_TO_43S | 2.22 | 0.00 | | GO_RIBOSOME_BIOGENESIS | 2.22 | 0.00 | | GO_RRNA_METABOLIC_PROCESS | 2.21 | 0.00 | | GO_CYTOSOLIC_RIBOSOME | 2.20 | 0.00 | | GO_TRANSLATIONAL_ELONGATION | 2.20 | 0.00 | | REACTOME_FORMATION_OF_THE_TERNARY_COMPLEX_AND_SUBSEQUENTLY_THE_43S_COMPLEX | 2.19 | 0.00 | | YAO_TEMPORAL_RESPONSE_TO_PROGESTERONE_CLUSTER_13 | 2.14 | 0.00 | | GO_LARGE_RIBOSOMAL_SUBUNIT | 2.14 | 0.00 | | CHNG_MULTIPLE_MYELOMA_HYPERPLOID_UP | 2.13 | 0.00 | | GO_SPLICEOSOMAL_TRI_SNRNP_COMPLEX | 2.12 | 0.00 | | GO_HORMONE_ACTIVITY | 2.10 | 0.00 | | REACTOME_RESPIRATORY_ELECTRON_TRANSPORT | 2.09 | 0.00 | | GO_PROTEIN_LOCALIZATION_TO_ENDOPLASMIC_RETICULUM | 2.09 | 0.00 | | GO_SMALL_RIBOSOMAL_SUBUNIT | 2.08 | 0.00 | | GO_DETECTION_OF_STIMULUS | 2.07 | 0.00 | | GO_NUCLEAR_TRANSCRIBED_MRNA_CATABOLIC_PROCESS_NONSENSE_MEDIATED_DECAY | 2.06 | 0.00 | | GO_PRECATALYTIC_SPLICEOSOME | 2.05 | 0.00 | | REACTOME_RESPIRATORY_ELECTRON_TRANSPORT_ATP_SYNTHESIS_BY_CHEMIOSMOTIC_COUPLING_AND_HEAT_PRODUCTION_BY_UNCOUPLING_PROTEINS_ | 2.05 | 0.00 | | GO_ORGANELLAR_RIBOSOME | 2.04 | 0.00 | | KEGG_SPLICEOSOME | 2.04 | 0.00 | | GO_CYTOSOLIC_LARGE_RIBOSOMAL_SUBUNIT | 2.03 | 0.01 | | GO_OXIDOREDUCTASE_ACTIVITY_ACTING_ON_NAD_P_H_QUINONE_OR_SIMILAR_COMPOUND_AS_ACCEPTOR | 2.01 | 0.01 | | GO_INNER_MITOCHONDRIAL_MEMBRANE_PROTEIN_COMPLEX | 2.01 | 0.01 | | BILANGES_SERUM_AND_RAPAMYCIN_SENSITIVE_GENES | 2.00 | 0.01 | | MOOTHA_VOXPHOS | 1.99 | 0.01 | | MEISSNER_NPC_HCP_WITH_H3K27ME3 | 1.98 | 0.01 | | GO_RIBONUCLEOPROTEIN_COMPLEX_BIOGENESIS | 1.98 | 0.01 | | GO_U1_SNRNP | 1.97 | 0.01 | | GO_STRUCTURAL_CONSTITUENT_OF_RIBOSOME | 1.97 | 0.01 | | GO_TRANSLATIONAL_TERMINATION | 1.97 | 0.01 | | GO_OXIDATIVE_PHOSPHORYLATION | 1.97 | 0.01 | | TAKAO_RESPONSE_TO_UVB_RADIATION_UP | 1.97 | 0.01 | | GO_CYTOSOLIC_SMALL_RIBOSOMAL_SUBUNIT | 1.97 | 0.01 | | GO_MITOCHONDRIAL_RESPIRATORY_CHAIN_COMPLEX_I_BIOGENESIS | 1.96 | 0.01 | | GO_PRERIBOSOME | 1.96 | 0.01 | | GO_RRNA_BINDING | 1.96 | 0.01 | | GO_PHOTORECEPTOR_DISC_MEMBRANE | 1.95 | 0.01 | | GO_POSITIVE_REGULATION_OF_SYNAPSE_ASSEMBLY | 1.94 | 0.01 | | HSIAO_HOUSEKEEPING_GENES | 1.94 | 0.01 | | GO_REGULATION_OF_DENDRITE_EXTENSION | 1.94 | 0.01 | | MODY_HIPPOCAMPUS_PRENATAL | 1.94 | 0.01 | | GO_REGULATION_OF_SYNAPSE_ASSEMBLY | 1.93 | 0.01 | | GO_U4_U6_X_U5_TRI_SNRNP_COMPLEX | 1.92 | 0.02 | | GO_PRESPLICEOSOME | 1.92 | 0.02 | | GO_PRERIBOSOME_LARGE_SUBUNIT_PRECURSOR | 1.91 | 0.02 | | GO_REGULATION_OF_RHODOPSIN_MEDIATED_SIGNALING_PATHWAY | 1.91 | 0.02 | | GO_NADH_DEHYDROGENASE_COMPLEX | 1.91 | 0.02 | | MIKKELSEN_IPS_WITH_HCP_H3K27ME3 | 1.91 | 0.02 | | GO_MITOCHONDRIAL_RESPIRATORY_CHAIN_COMPLEX_ASSEMBLY | 1.89 | 0.02 | | GO_NCRNA_PROCESSING | 1.89 | 0.02 | | GO_U2_TYPE_SPLICEOSOMAL_COMPLEX | 1.89 | 0.02 | | DIRMEIER_LMP1_RESPONSE_EARLY | 1.89 | 0.02 | | GO_SMALL_NUCLEAR_RIBONUCLEOPROTEIN_COMPLEX | 1.88 | 0.02 | | GO_SPLICEOSOMAL_COMPLEX | 1.88 | 0.02 | | GO_PROTEIN_LOCALIZATION_TO_SYNAPSE | 1.87 | 0.03 | | GO_GROWTH_FACTOR_ACTIVITY | 1.85 | 0.03 | | GO_U2_SNRNP | 1.85 | 0.03 | | KEGG_MATURITY_ONSET_DIABETES_OF_THE_YOUNG | 1.85 | 0.03 | | REACTOME_METABOLISM_OF_MRNA | 1.84 | 0.03 | | CHICAS_RB1_TARGETS_LOW_SERUM | 1.84 | 0.03 | | GO_RIBOSOMAL_SMALL_SUBUNIT_BIOGENESIS | 1.84 | 0.03 | | GO_RIBOSOMAL_LARGE_SUBUNIT_BIOGENESIS | 1.83 | 0.04 | | GO_RESPONSE_TO_ELECTRICAL_STIMULUS | 1.82 | 0.04 | | GO_NUCLEOLAR_PART | 1.82 | 0.04 | | PID_RHODOPSIN_PATHWAY | 1.81 | 0.04 | | GO_MITOCHONDRIAL_TRANSLATION | 1.81 | 0.04 | | MIKKELSEN_ES_HCP_WITH_H3K27ME3 | 1.81 | 0.04 | | REACTOME_AMINE_DERIVED_HORMONES | 1.81 | 0.04 | | GO_POSITIVE_REGULATION_OF_SYNAPTIC_TRANSMISSION_GLUTAMATERGIC | 1.80 | 0.04 | | GO_DENTATE_GYRUS_DEVELOPMENT | 1.80 | 0.04 | | REACTOME_GLUCAGON_TYPE_LIGAND_RECEPTORS | 1.80 | 0.05 | | GO_NEURONAL_ACTION_POTENTIAL | 1.79 | 0.05 | | MIKKELSEN_NPC_HCP_WITH_H3K27ME3 | 1.79 | 0.05 | | GO_EATING_BEHAVIOR | 1.78 | 0.06 | | GO_REGULATION_OF_SYNAPSE_ORGANIZATION | 1.78 | 0.06 | | MIKKELSEN_MEF_HCP_WITH_H3_UNMETHYLATED | 1.77 | 0.06 | | GO_POSITIVE_REGULATION_OF_SYNAPTIC_TRANSMISSION | 1.77 | 0.06 | | GO_TRANSMISSION_OF_NERVE_IMPULSE | 1.77 | 0.06 | | GO_REGULATION_OF_N_METHYL_D_ASPARTATE_SELECTIVE_GLUTAMATE_RECEPTOR_ACTIVITY | 1.77 | 0.06 | | GO_RESPIRATORY_CHAIN | 1.77 | 0.06 | | GO_CATALYTIC_STEP_2_SPLICEOSOME | 1.76 | 0.06 | | WEBER_METHYLATED_HCP_IN_SPERM_UP | 1.76 | 0.06 | | GO_RNA_SPLICING_VIA_TRANSESTERIFICATION_REACTIONS | 1.75 | 0.06 | | MIKKELSEN_MEF_ICP_WITH_H3K27ME3 | 1.75 | 0.07 | |
| --- | --- | --- | --- | --- | --- | --- | --- | --- | --- | --- | --- | --- | --- | --- | --- | --- | --- | --- | --- | --- | --- | --- | --- | --- | --- | --- | --- | --- | --- | --- | --- | --- | --- | --- | --- | --- | --- | --- | --- | --- | --- | --- | --- | --- | --- | --- | --- | --- | --- | --- | --- | --- | --- | --- | --- | --- | --- | --- | --- | --- | --- | --- | --- | --- | --- | --- | --- | --- | --- | --- | --- | --- | --- | --- | --- | --- | --- | --- | --- | --- | --- | --- | --- | --- | --- | --- | --- | --- | --- | --- | --- | --- | --- | --- | --- | --- | --- | --- | --- | --- | --- | --- | --- | --- | --- | --- | --- | --- | --- | --- | --- | --- | --- | --- | --- | --- | --- | --- | --- | --- | --- | --- | --- | --- | --- | --- | --- | --- | --- | --- | --- | --- | --- | --- | --- | --- | --- | --- | --- | --- | --- | --- | --- | --- | --- | --- | --- | --- | --- | --- | --- | --- | --- | --- | --- | --- | --- | --- | --- | --- | --- | --- | --- | --- | --- | --- | --- | --- | --- | --- | --- | --- | --- | --- | --- | --- | --- | --- | --- | --- | --- | --- | --- | --- | --- | --- | --- | --- | --- | --- | --- | --- | --- | --- | --- | --- | --- | --- | --- | --- | --- | --- | --- | --- | --- | --- | --- | --- | --- | --- | --- | --- | --- | --- | --- | --- | --- | --- | --- | --- | --- | --- | --- | --- | --- | --- | --- | --- | --- | --- | --- | --- | --- | --- | --- | --- | --- | --- | --- | --- | --- | --- | --- | --- | --- | --- | --- | --- | --- | --- | --- | --- | --- | --- | --- | --- | --- | --- | --- | --- | --- | --- | --- | --- | --- | --- | --- | --- | --- | --- | --- | --- | --- | --- | --- | --- | --- | --- | --- | --- | --- | --- | --- | --- | --- | --- | --- | --- | --- | --- | --- | --- | --- | --- | --- | --- | --- | --- | --- | --- | --- | --- | --- |

***Top 100 downregulated GSEA pathways with ExTr***

| | **NAME** | **NES** | **FDR q-val** | | --- | --- | --- | | REACTOME_PI_METABOLISM | -2.13 | 0.04 | | GABRIELY_MIR21_TARGETS | -2.09 | 0.05 | | GO_PHOSPHATIDYLINOSITOL_PHOSPHATE_PHOSPHATASE_ACTIVITY | -2.08 | 0.04 | | ZHENG_FOXP3_TARGETS_IN_THYMUS_UP | -2.06 | 0.04 | | SENESE_HDAC1_TARGETS_UP | -2.05 | 0.04 | | KEGG_INSULIN_SIGNALING_PATHWAY | -2.04 | 0.04 | | DACOSTA_UV_RESPONSE_VIA_ERCC3_COMMON_DN | -2.02 | 0.04 | | GO_SEMAPHORIN_PLEXIN_SIGNALING_PATHWAY | -2.01 | 0.04 | | WINTER_HYPOXIA_DN | -2.00 | 0.05 | | GO_INTEGRIN_MEDIATED_SIGNALING_PATHWAY | -1.99 | 0.05 | | DACOSTA_UV_RESPONSE_VIA_ERCC3_XPCS_DN | -1.98 | 0.05 | | PID_MET_PATHWAY | -1.97 | 0.05 | | REACTOME_REGULATION_OF_SIGNALING_BY_CBL | -1.97 | 0.05 | | MARSON_FOXP3_TARGETS_STIMULATED_UP | -1.96 | 0.06 | | SENESE_HDAC3_TARGETS_UP | -1.96 | 0.05 | | GO_LIPID_TRANSLOCATION | -1.96 | 0.06 | | BYSTROEM_CORRELATED_WITH_IL5_DN | -1.95 | 0.06 | | PID_FAK_PATHWAY | -1.95 | 0.05 | | ZHENG_BOUND_BY_FOXP3 | -1.94 | 0.06 | | REACTOME_SYNTHESIS_OF_PIPS_AT_THE_PLASMA_MEMBRANE | -1.93 | 0.06 | | MASSARWEH_TAMOXIFEN_RESISTANCE_UP | -1.93 | 0.06 | | GO_PHOSPHOLIPID_TRANSLOCATING_ATPASE_ACTIVITY | -1.93 | 0.06 | | PID_CXCR4_PATHWAY | -1.92 | 0.06 | | SCHRAMM_INHBA_TARGETS_DN | -1.92 | 0.06 | | GO_PHOSPHATIDYLINOSITOL_DEPHOSPHORYLATION | -1.92 | 0.06 | | PID_ERBB1_DOWNSTREAM_PATHWAY | -1.92 | 0.05 | | GO_HIPPO_SIGNALING | -1.92 | 0.05 | | GO_LIPOPROTEIN_PARTICLE_RECEPTOR_ACTIVITY | -1.91 | 0.06 | | BEGUM_TARGETS_OF_PAX3_FOXO1_FUSION_UP | -1.91 | 0.06 | | PID_INTEGRIN_CS_PATHWAY | -1.91 | 0.06 | | GO_GOLGI_TO_VACUOLE_TRANSPORT | -1.89 | 0.07 | | GO_MAP_KINASE_KINASE_KINASE_ACTIVITY | -1.89 | 0.07 | | GO_PHOSPHOLIPID_DEPHOSPHORYLATION | -1.89 | 0.07 | | KEGG_CHRONIC_MYELOID_LEUKEMIA | -1.89 | 0.07 | | SIG_BCR_SIGNALING_PATHWAY | -1.88 | 0.07 | | KEGG_PHOSPHATIDYLINOSITOL_SIGNALING_SYSTEM | -1.88 | 0.07 | | HALLMARK_PROTEIN_SECRETION | -1.88 | 0.07 | | LEE_DIFFERENTIATING_T_LYMPHOCYTE | -1.88 | 0.07 | | KEGG_NATURAL_KILLER_CELL_MEDIATED_CYTOTOXICITY | -1.88 | 0.07 | | DACOSTA_UV_RESPONSE_VIA_ERCC3_TTD_DN | -1.88 | 0.07 | | HUTTMANN_B_CLL_POOR_SURVIVAL_DN | -1.88 | 0.06 | | ST_ADRENERGIC | -1.88 | 0.06 | | REACTOME_MAPK_TARGETS_NUCLEAR_EVENTS_MEDIATED_BY_MAP_KINASES | -1.88 | 0.06 | | MAHADEVAN_IMATINIB_RESISTANCE_DN | -1.87 | 0.07 | | GO_PEPTIDYL_THREONINE_MODIFICATION | -1.86 | 0.07 | | KEGG_INOSITOL_PHOSPHATE_METABOLISM | -1.86 | 0.07 | | CASORELLI_APL_SECONDARY_VS_DE_NOVO_UP | -1.86 | 0.07 | | BIOCARTA_MET_PATHWAY | -1.85 | 0.08 | | GO_PHAGOCYTOSIS_ENGULFMENT | -1.85 | 0.07 | | GO_PROTEIN_COMPLEX_INVOLVED_IN_CELL_ADHESION | -1.85 | 0.08 | | VERHAAK_AML_WITH_NPM1_MUTATED_DN | -1.85 | 0.08 | | KIM_GERMINAL_CENTER_T_HELPER_UP | -1.84 | 0.08 | | GO_NUCLEAR_PORE | -1.84 | 0.08 | | GO_REGULATION_OF_AXON_GUIDANCE | -1.84 | 0.08 | | GO_PROTEIN_K48_LINKED_DEUBIQUITINATION | -1.83 | 0.09 | | DAZARD_RESPONSE_TO_UV_NHEK_DN | -1.83 | 0.09 | | CREIGHTON_ENDOCRINE_THERAPY_RESISTANCE_5 | -1.83 | 0.09 | | PLASARI_TGFB1_SIGNALING_VIA_NFIC_10HR_UP | -1.83 | 0.09 | | GO_GOLGI_ORGANIZATION | -1.83 | 0.08 | | HOWLIN_CITED1_TARGETS_1_DN | -1.83 | 0.08 | | PID_NECTIN_PATHWAY | -1.83 | 0.08 | | GO_CELL_JUNCTION_ASSEMBLY | -1.82 | 0.08 | | GO_REGULATION_OF_FATTY_ACID_METABOLIC_PROCESS | -1.82 | 0.08 | | REACTOME_OTHER_SEMAPHORIN_INTERACTIONS | -1.82 | 0.08 | | RUIZ_TNC_TARGETS_UP | -1.82 | 0.08 | | TORCHIA_TARGETS_OF_EWSR1_FLI1_FUSION_DN | -1.82 | 0.08 | | GO_TRNA_TRANSPORT | -1.82 | 0.08 | | PID_INSULIN_PATHWAY | -1.81 | 0.09 | | PID_PDGFRB_PATHWAY | -1.81 | 0.08 | | REACTOME_COSTIMULATION_BY_THE_CD28_FAMILY | -1.81 | 0.08 | | REACTOME_SIGNALING_BY_SCF_KIT | -1.81 | 0.08 | | BHAT_ESR1_TARGETS_VIA_AKT1_DN | -1.81 | 0.08 | | WAMUNYOKOLI_OVARIAN_CANCER_GRADES_1_2_UP | -1.81 | 0.08 | | GO_UBIQUITIN_LIKE_PROTEIN_LIGASE_ACTIVITY | -1.80 | 0.09 | | GO_HISTONE_DEMETHYLASE_ACTIVITY | -1.80 | 0.09 | | KEGG_GLYCOSAMINOGLYCAN_BIOSYNTHESIS_CHONDROITIN_SULFATE | -1.80 | 0.09 | | SIG_PIP3_SIGNALING_IN_B_LYMPHOCYTES | -1.80 | 0.09 | | REACTOME_CHYLOMICRON_MEDIATED_LIPID_TRANSPORT | -1.80 | 0.09 | | GAVIN_PDE3B_TARGETS | -1.79 | 0.10 | | GO_INTERMEDIATE_FILAMENT_ORGANIZATION | -1.79 | 0.10 | | REACTOME_MAP_KINASE_ACTIVATION_IN_TLR_CASCADE | -1.79 | 0.10 | | GO_PHAGOCYTOSIS | -1.79 | 0.10 | | GO_REGULATION_OF_CELLULAR_RESPONSE_TO_HEAT | -1.79 | 0.10 | | GO_PLATELET_ACTIVATION | -1.79 | 0.10 | | PID_BCR_5PATHWAY | -1.79 | 0.10 | | SENESE_HDAC1_AND_HDAC2_TARGETS_UP | -1.78 | 0.10 | | GO_GTPASE_BINDING | -1.78 | 0.10 | | REACTOME_NUCLEAR_EVENTS_KINASE_AND_TRANSCRIPTION_FACTOR_ACTIVATION | -1.78 | 0.10 | | WU_SILENCED_BY_METHYLATION_IN_BLADDER_CANCER | -1.77 | 0.11 | | DAZARD_UV_RESPONSE_CLUSTER_G6 | -1.77 | 0.11 | | GO_GOLGI_TO_ENDOSOME_TRANSPORT | -1.77 | 0.11 | | VERRECCHIA_EARLY_RESPONSE_TO_TGFB1 | -1.77 | 0.11 | | PID_VEGFR1_2_PATHWAY | -1.77 | 0.11 | | GO_NEGATIVE_REGULATION_OF_BLOOD_CIRCULATION | -1.77 | 0.11 | | PID_FCER1_PATHWAY | -1.77 | 0.11 | | GO_PROTEIN_LOCALIZATION_TO_VACUOLE | -1.77 | 0.11 | | GO_REGULATION_OF_COFACTOR_METABOLIC_PROCESS | -1.77 | 0.11 | | GO_TRANSFORMING_GROWTH_FACTOR_BETA_BINDING | -1.76 | 0.11 | | GO_REGULATION_OF_SMALL_GTPASE_MEDIATED_SIGNAL_TRANSDUCTION+A53:A100 | -1.76 | 0.11 | | REACTOME_ION_TRANSPORT_BY_P_TYPE_ATPASES | -1.76 | 0.11 | |
| --- | --- | --- | --- | --- | --- | --- | --- | --- | --- | --- | --- | --- | --- | --- | --- | --- | --- | --- | --- | --- | --- | --- | --- | --- | --- | --- | --- | --- | --- | --- | --- | --- | --- | --- | --- | --- | --- | --- | --- | --- | --- | --- | --- | --- | --- | --- | --- | --- | --- | --- | --- | --- | --- | --- | --- | --- | --- | --- | --- | --- | --- | --- | --- | --- | --- | --- | --- | --- | --- | --- | --- | --- | --- | --- | --- | --- | --- | --- | --- | --- | --- | --- | --- | --- | --- | --- | --- | --- | --- | --- | --- | --- | --- | --- | --- | --- | --- | --- | --- | --- | --- | --- | --- | --- | --- | --- | --- | --- | --- | --- | --- | --- | --- | --- | --- | --- | --- | --- | --- | --- | --- | --- | --- | --- | --- | --- | --- | --- | --- | --- | --- | --- | --- | --- | --- | --- | --- | --- | --- | --- | --- | --- | --- | --- | --- | --- | --- | --- | --- | --- | --- | --- | --- | --- | --- | --- | --- | --- | --- | --- | --- | --- | --- | --- | --- | --- | --- | --- | --- | --- | --- | --- | --- | --- | --- | --- | --- | --- | --- | --- | --- | --- | --- | --- | --- | --- | --- | --- | --- | --- | --- | --- | --- | --- | --- | --- | --- | --- | --- | --- | --- | --- | --- | --- | --- | --- | --- | --- | --- | --- | --- | --- | --- | --- | --- | --- | --- | --- | --- | --- | --- | --- | --- | --- | --- | --- | --- | --- | --- | --- | --- | --- | --- | --- | --- | --- | --- | --- | --- | --- | --- | --- | --- | --- | --- | --- | --- | --- | --- | --- | --- | --- | --- | --- | --- | --- | --- | --- | --- | --- | --- | --- | --- | --- | --- | --- | --- | --- | --- | --- | --- | --- | --- | --- | --- | --- | --- | --- | --- | --- | --- | --- | --- | --- | --- | --- | --- | --- | --- | --- | --- | --- | --- | --- | --- | --- | --- | --- | --- | --- | --- | --- | --- |
